# Supplementary material for: Comparing genomes recovered from time-series metagenomes using long- and short-read sequencing technologies
Source: PubMed Central journal article supplement (PMC10182627; doi:10.1186/s40168-023-01557-3), 2023-05-13

# Supplementary Figure 1

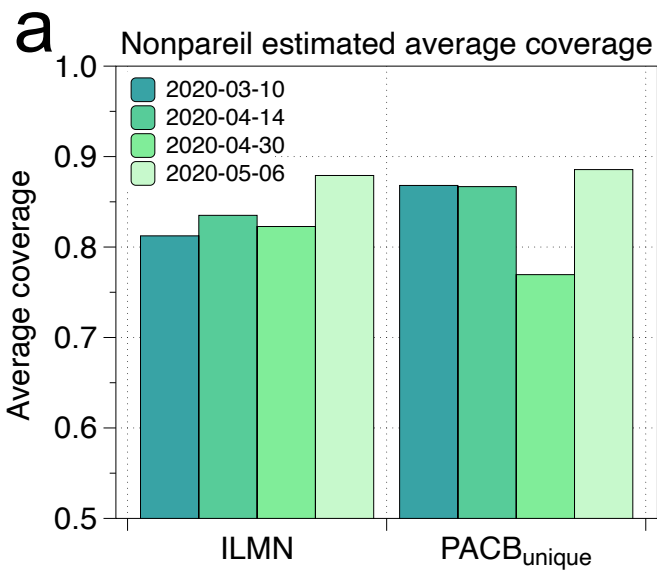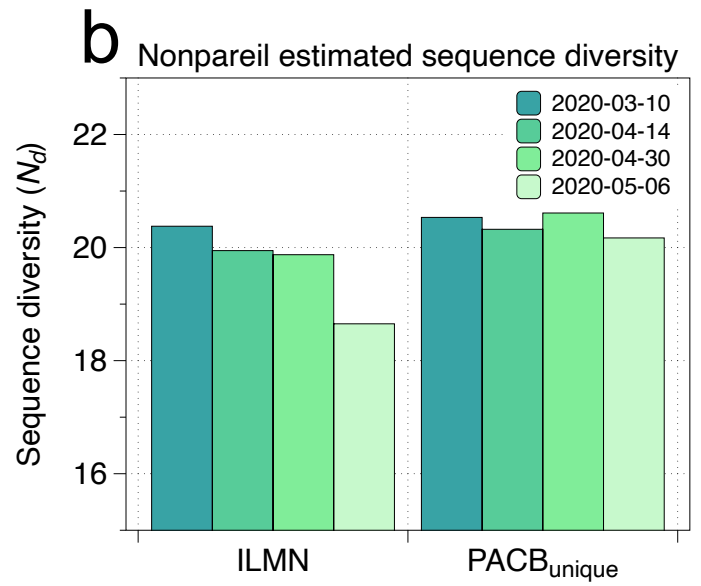

## Supplementary Figure 2

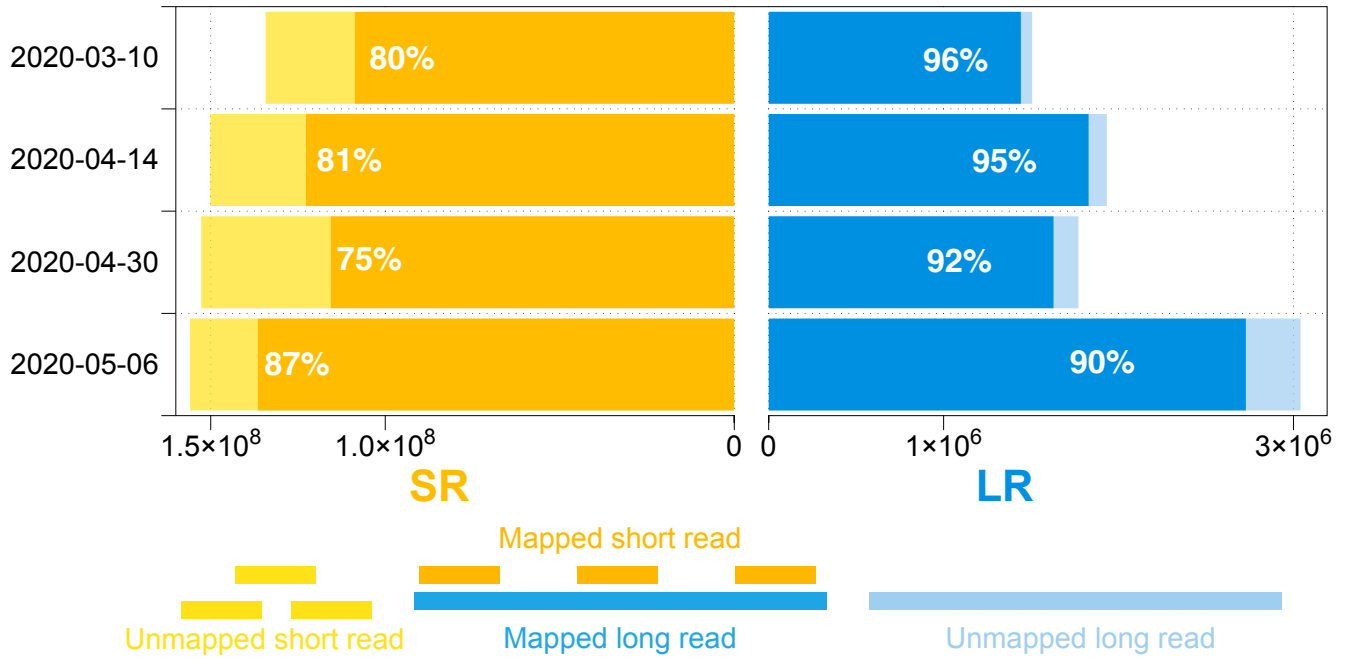

# Supplementary Figure 3

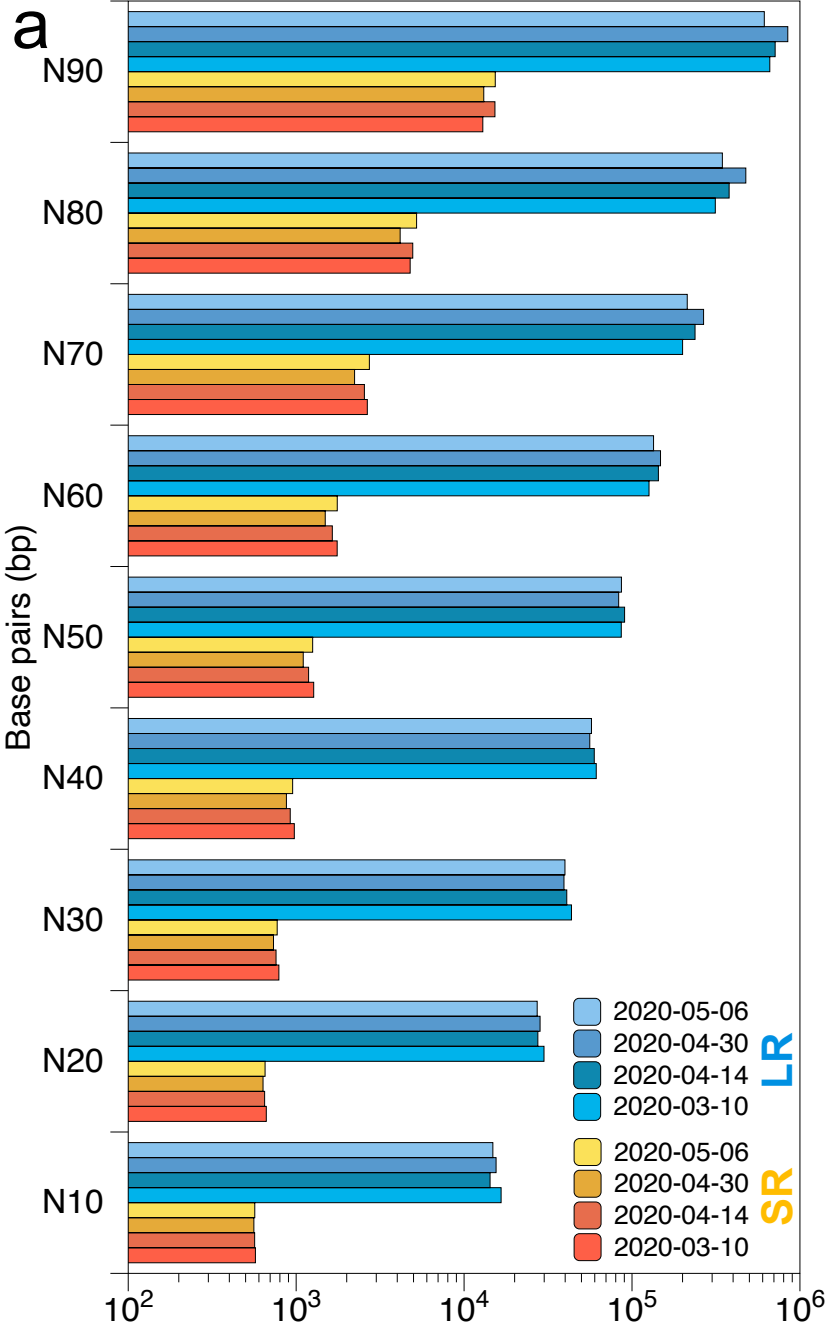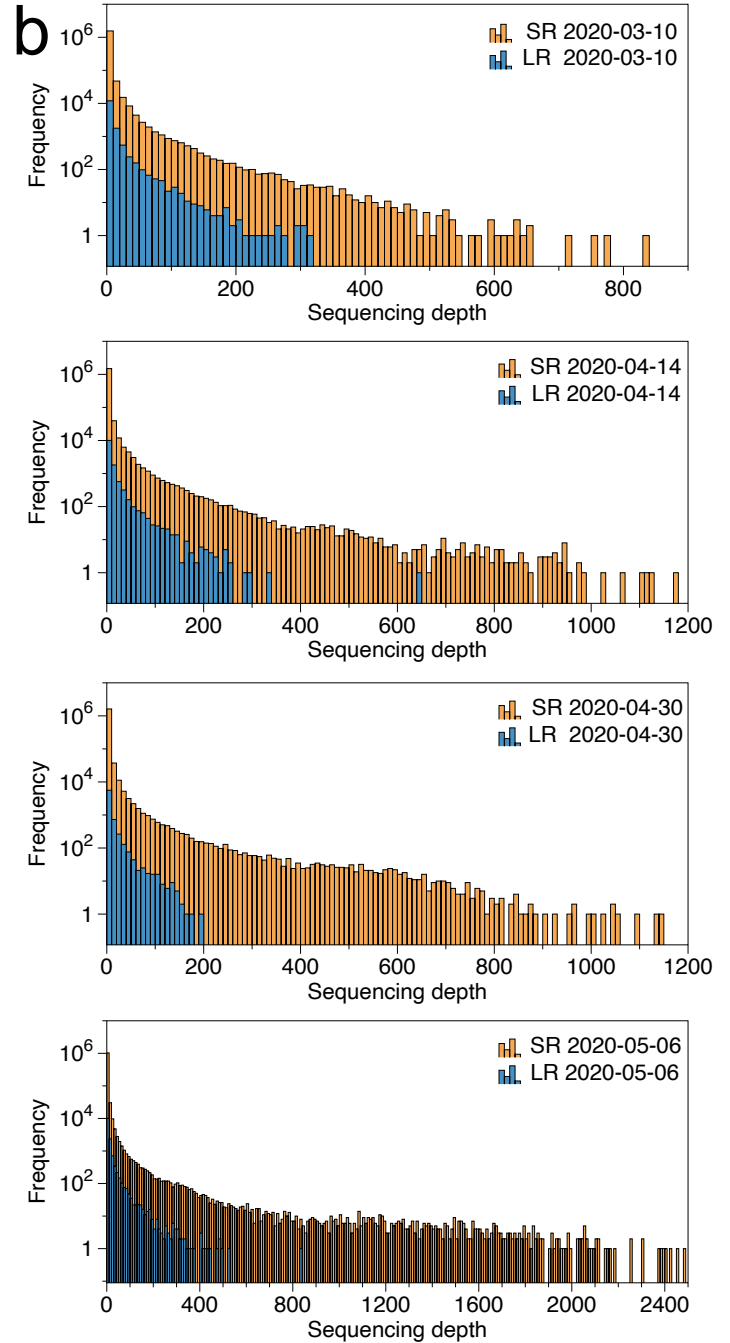

# Supplementary Figure 4

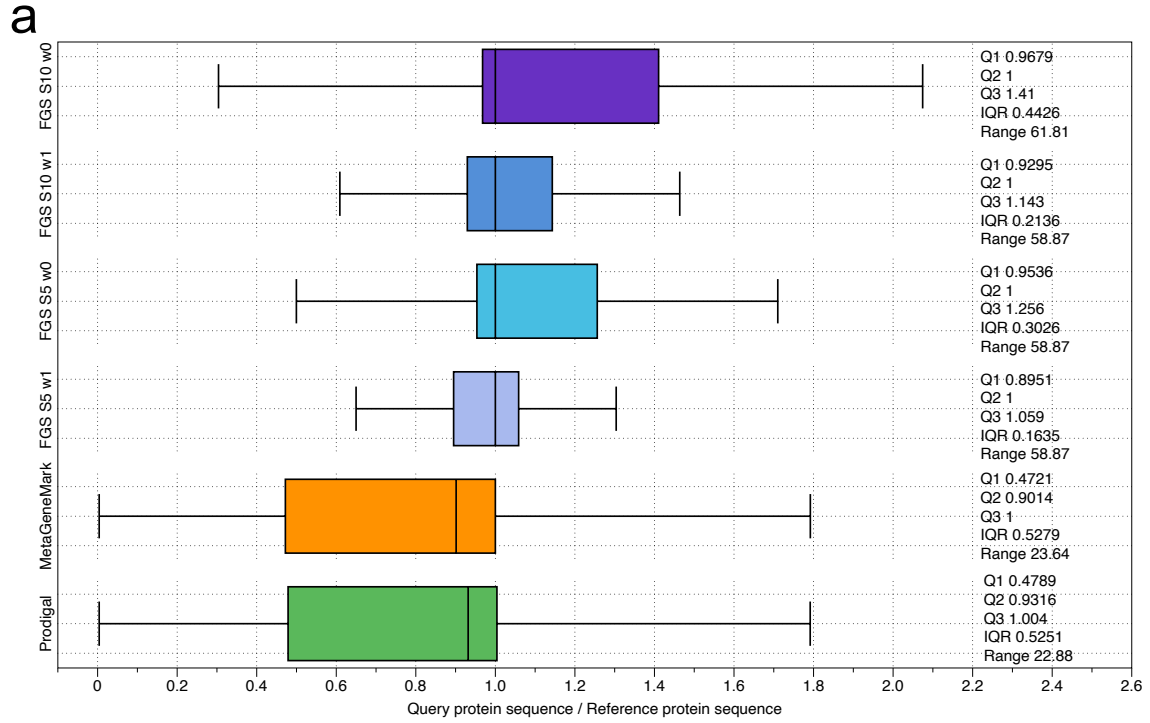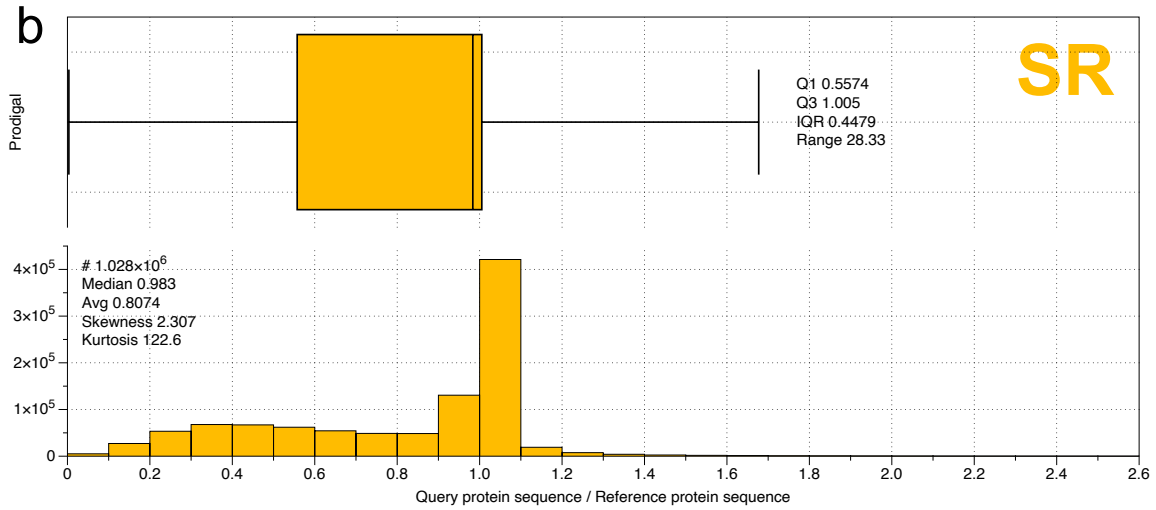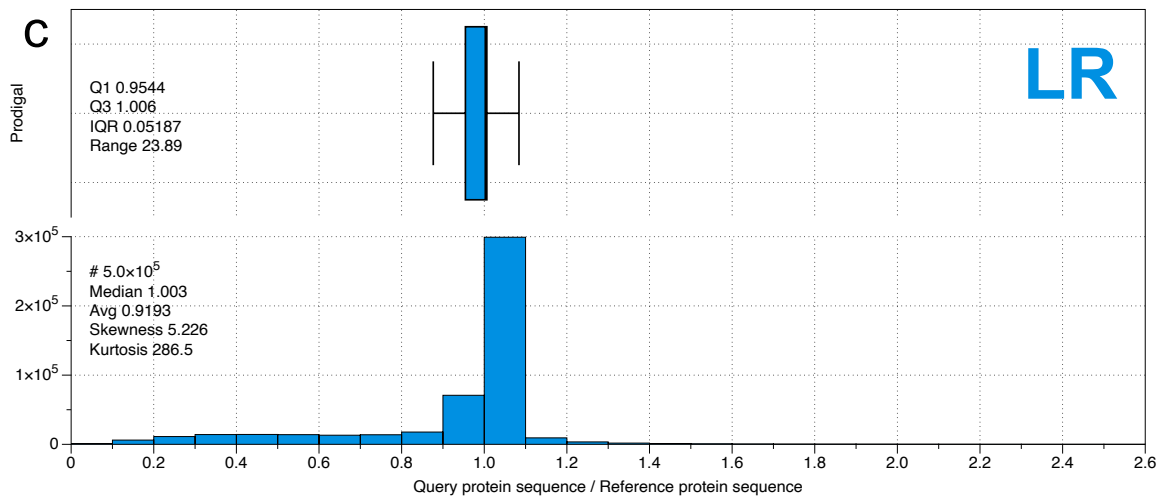

# Supplementary Figure 5

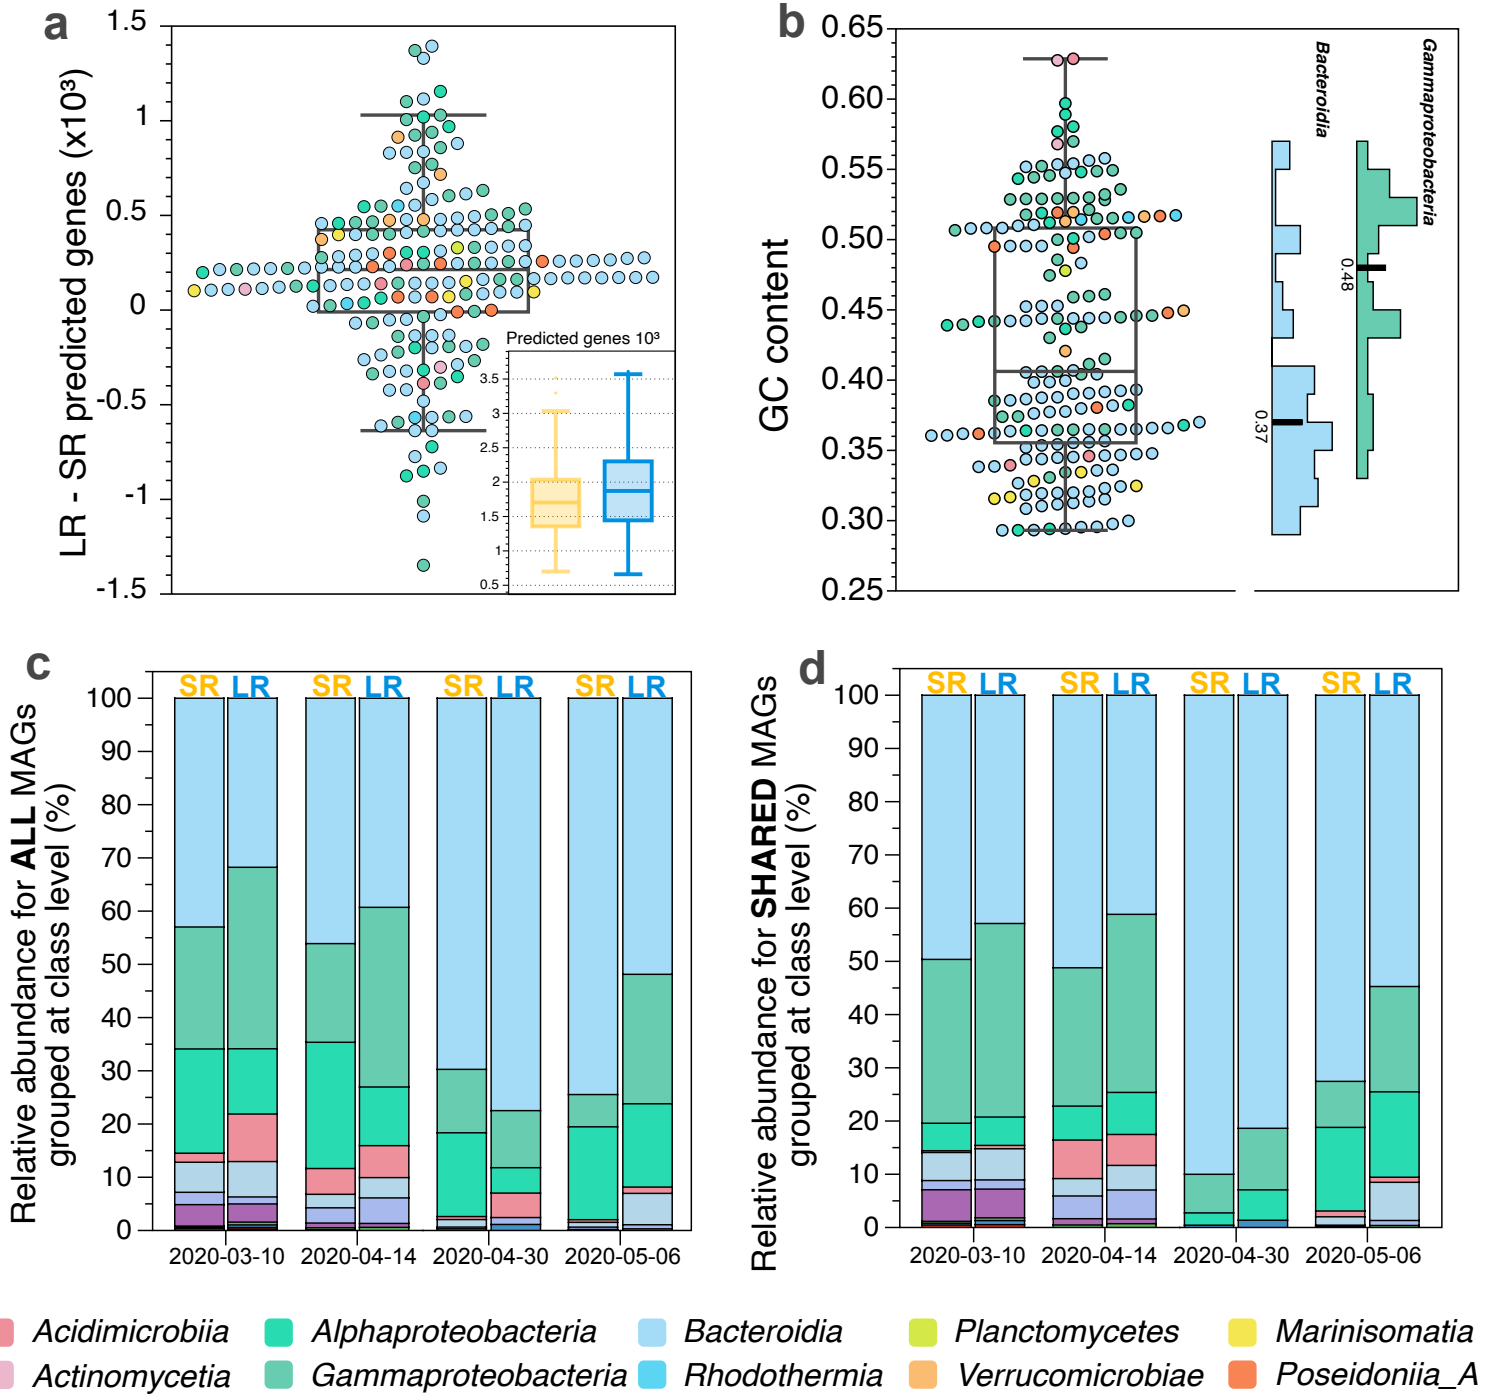

## Supplementary Figure 6

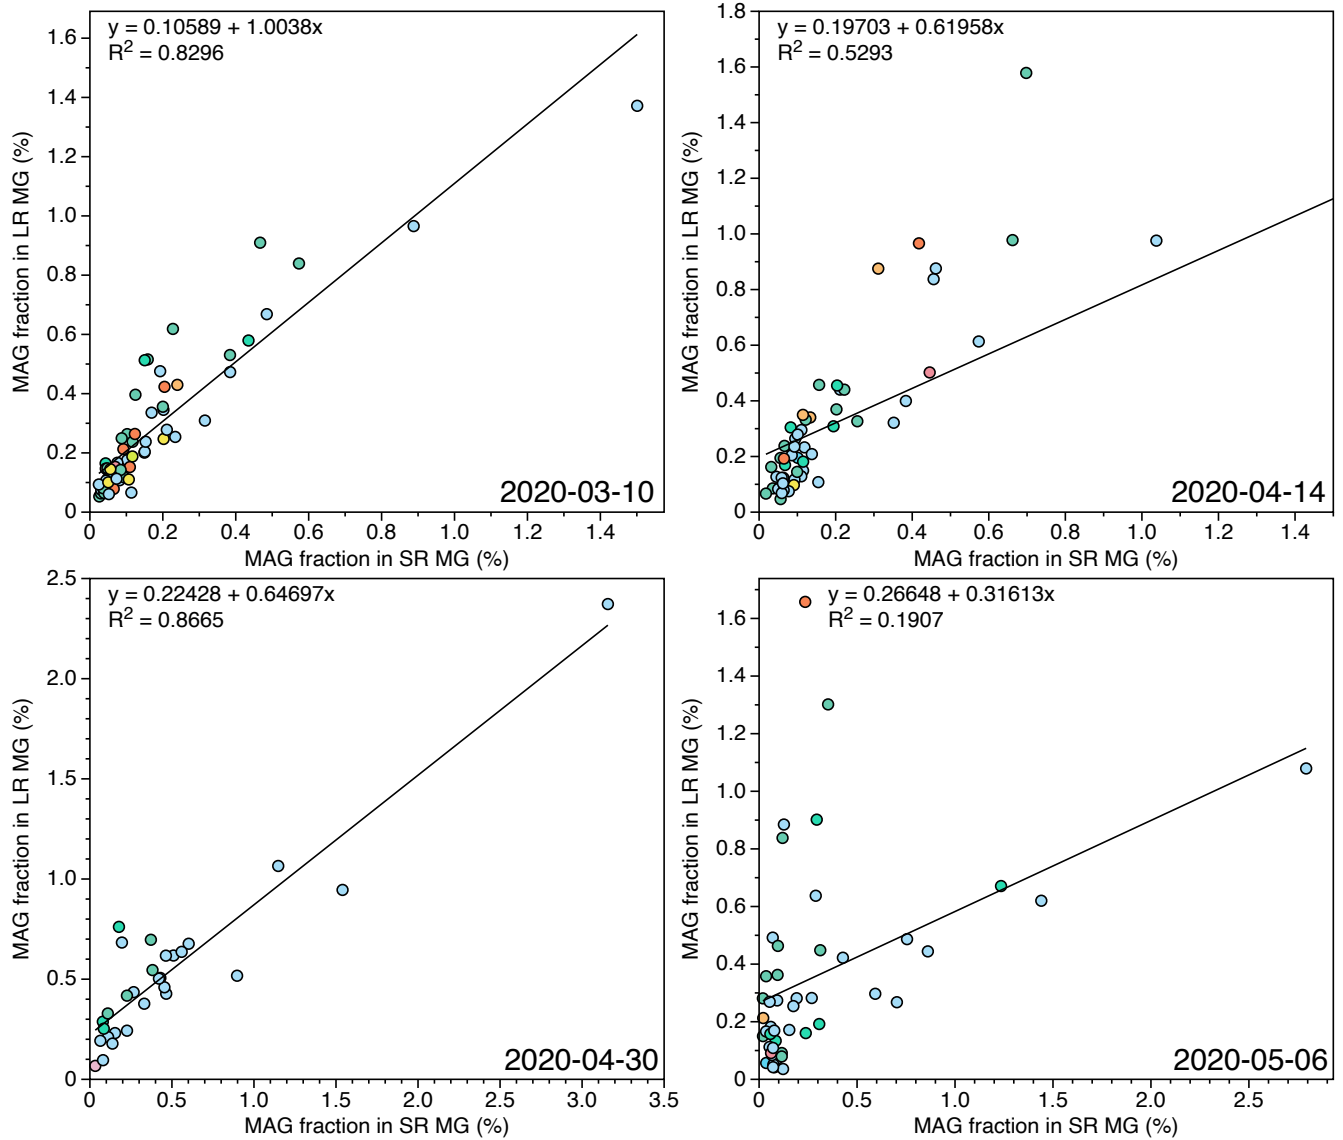

- |                                                          |                                                                |                                                              |                                                               |                                                            |
|----------------------------------------------------------|----------------------------------------------------------------|--------------------------------------------------------------|---------------------------------------------------------------|------------------------------------------------------------|
| <span style="color: red;">●</span> <i>Acidimicrobiia</i> | <span style="color: cyan;">●</span> <i>Alphaproteobacteria</i> | <span style="color: lightblue;">●</span> <i>Bacteroidia</i>  | <span style="color: yellow;">●</span> <i>Planctomycetes</i>   | <span style="color: orange;">●</span> <i>Marinisomatia</i> |
| <span style="color: pink;">●</span> <i>Actinomycetia</i> | <span style="color: teal;">●</span> <i>Gammaproteobacteria</i> | <span style="color: lightcyan;">●</span> <i>Rhodothermia</i> | <span style="color: orange;">●</span> <i>Verrucomicrobiae</i> | <span style="color: red;">●</span> <i>Poseidonii_A</i>     |

# Supplementary Figure 7

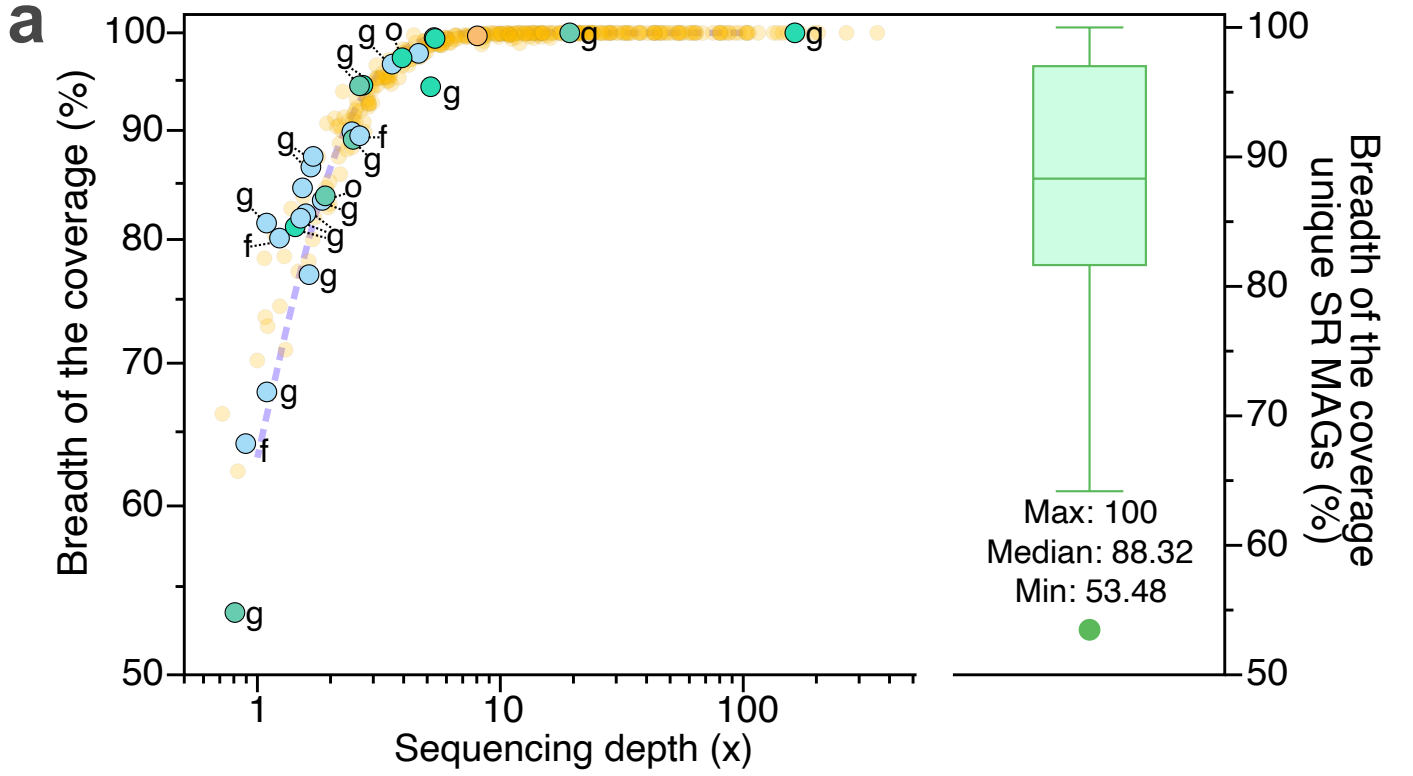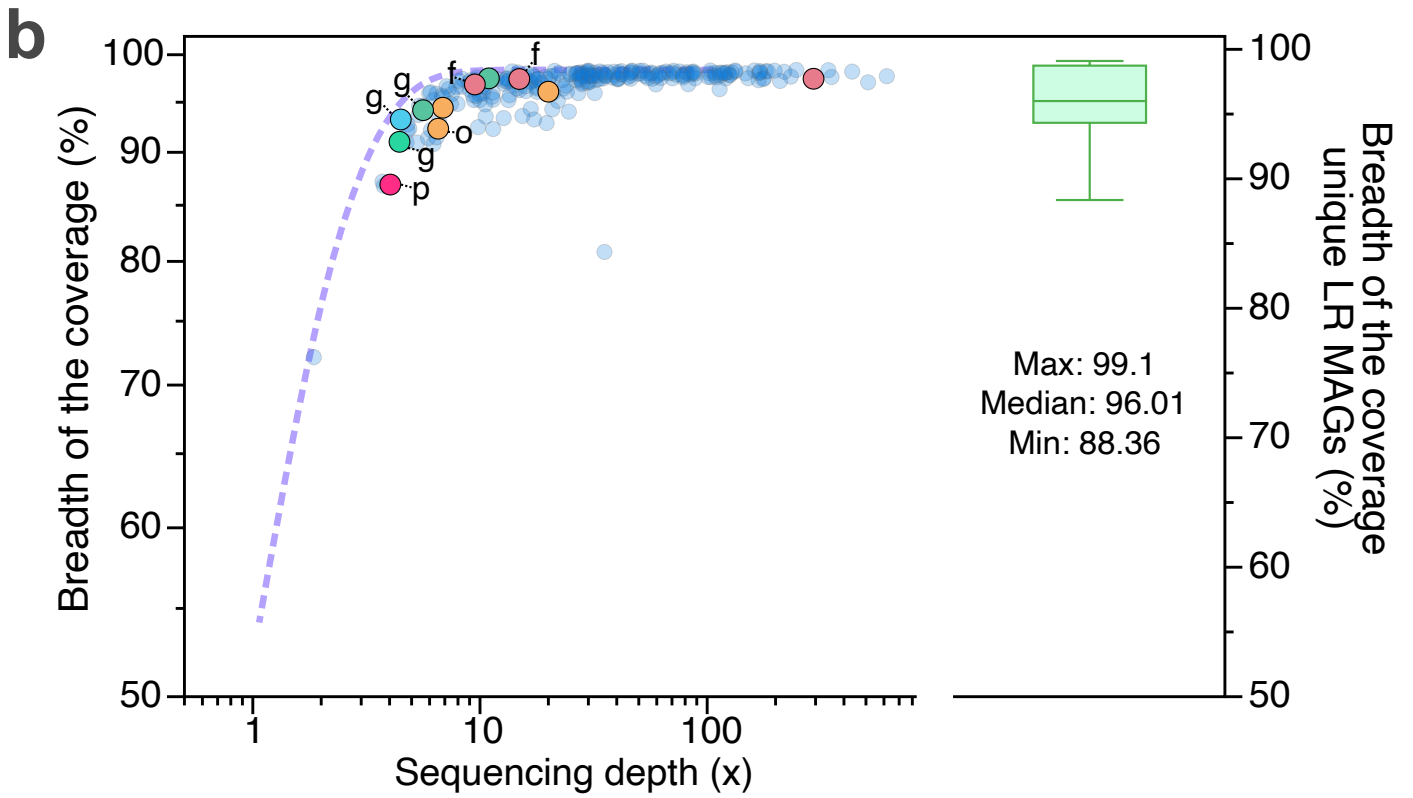

Supplement: 40168_2023_1557_MOESM1_ESM.pdf [file 40168_2023_1557_MOESM1_ESM.pdf]
